# Supplementary material
Source: Springer Nature journal article supplement (https://www.springermedizin.de/resource/supplementary/12889_2012_4668_MOESM1_ESM.pdf/9493598)
Supplement: MOESM1 [file 9493598]

## Recruitment

Assessed for eligibility (n=10046)

Excluded (n=9445)

- ◆ Not meeting inclusion criteria (n=2675)
- ◆ Declined to participate (n=354)
- ◆ Other reasons (n=6416)
  - No response (3018)
  - Already seen (3038)
  - Missing key data or left area (360)

Randomized (n=601)

## Allocation

Allocated to NHS Health Check only (n=365)

- ◆ Received allocated intervention (n=365)
- ◆ Did not receive allocated intervention (n=0)

Allocated to NHS Health Check plus (n=236)

- ◆ Received allocated intervention (n=236)
- ◆ Did not receive allocated intervention (n=0)

## Follow-Up

Lost to follow-up (n=11)

- ◆ No response to follow-up request (11)

Discontinued intervention (n=59)

- ◆ Treatment not effective (43), could not tolerate medication (16)

Lost to follow-up (n=9)

- ◆ No response to follow-up request (4), did not contact lifestyle coach (2), moved area (3)

Discontinued intervention (n=36)

- ◆ Treatment not effective (19), could not tolerate medication (10), deteriorating health (unrelated to intervention) (7)

## Analysis

Analysed (n=365)

- ◆ Excluded from analysis (n=0)
- ITT analysis; data carried forward for 70 missing values at follow-up

Analysed (n=236)

- ◆ Excluded from analysis (n=0)
- ITT analysis; data carried forward for 45 missing values at follow-up
